# Supplementary material for: Simultaneous Quantitative Analysis of Six Isothiazolinones in Water-Based Adhesive Used for Food Contact Materials by High-Performance Liquid Chromatography–Tandem Mass Spectrometry (HPLC–MS/MS)
Source: PubMed Central journal article supplement (PMC6865086; doi:10.3390/molecules24213894), 2019-10-29

## The supplementary materials

Figure s1 Gradient elution program of mobile phase in qualitative analysis of standard solution of MI,CMI,BIT,MBIT,OIT and COIT

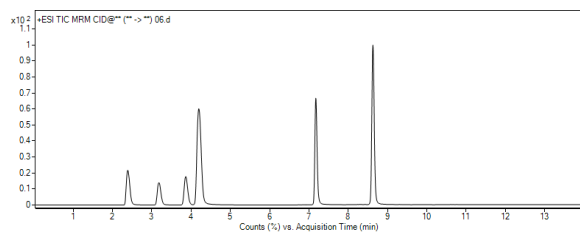

| Time(min) | B:Methanol (%) | Flow(mL/min) |
|-----------|----------------|--------------|
| 0         | 50             | 0.3          |
| 1         | 50             | 0.3          |
| 1.5       | 90             | 0.3          |
| 6         | 90             | 0.3          |
| 6.1       | 50             | 0.3          |
| 14        | 50             | 0.3          |

| Time(min) | B:Methanol (%) | Flow(mL/min) |
|-----------|----------------|--------------|
| 0         | 50             | 0.3          |
| 3         | 50             | 0.3          |
| 6         | 90             | 0.3          |
| 12        | 90             | 0.3          |
| 12.1      | 50             | 0.3          |
| 20        | 50             | 0.3          |

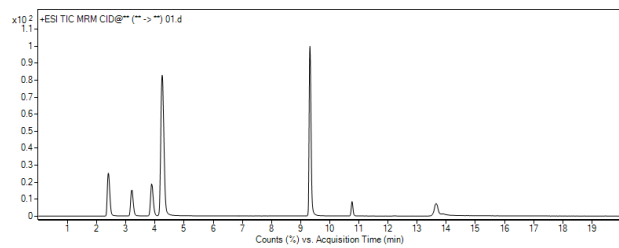

Supplement: molecules-24-03894-s001.pdf [file molecules-24-03894-s001.pdf]
